# Supplementary material for: Review of the Ethics, Policies and Regulations of a Global Patient co-Owned Cloud (GPOC)
Source: Research Square preprint supplement (doi:10.21203/rs.3.rs-3353005/v1), 2024-01-26
Supplement: Supplementary file 1 [file 2a91fafd4eab7967ed0683cd.docx]

***Supplement 2 (S2): Ethics-Policy-Reg GPOC Interviews and Supplementary Written Correspondence***

*For all UN member states (193+3) and organisations (n=18) at least two direct personal contacts were established. Often >3 contacts, in many cases up to 5 or 6 contacts. All their contact details are kept in an unofficial depot. In this archive the specific answers in the GPOC Interviews, and the answers of the GPOC Survey, of each individual state are kept. For privacy and integrity reasons these archival documents cannot be made public. 50 interviews were included in the series. Supplementary written email and LinkedIn correspondence has been kept for 100% of the below 214 entities. For some nations several conversations were carried out to also encompass states (USA, Australia, Canada) or regulatory agencies (Brazil, UK, USA). These have though been fused into one interview annotation (#1-50). Interviews with the EU, and specific regulatory bodies have not been included below, but have also been mirrored in article table 1. The total number of conversations is >100. Written correspondence per email or LinkedIn was carried out at least three times with all the 214 entities, both associated with the Survey and Summit invitations, but also when receiving supplementary information. Note the gender balance of 26 ♀ and 24 ♂. The GPOC Summit also had 50% distribution, which may mirror the GPOC Survey.*

| **UN Member States (193+3) A-Z first, organisations ensuite** | **Direct Contact KOL** | **Official Mail**  **Corr.** | **Diplomatic List Contact** | **UN Mission Contact** | **Health Ministry Contact** | **Senior**  **State/Org. Experts #** | **Annotated Interview (# No.)** |
| --- | --- | --- | --- | --- | --- | --- | --- |
| Afghanistan | √ | √ | √ | - | Former | 3 |  |
| Albania | √ | √ | √ | √ | √ | 1 |  |
| Algeria | √ | √ | √ | √ | √ | 5 |  |
| Andorra | √ | √ | √ | √ | √ | 1 |  |
| Angola | √ | √ | √ | √ | √ | 1 |  |
| Antigua and Barbuda | √ | √ | √ | √ | √ | 1 |  |
| Argentina | √ | √ | √ | √ | √ | 3 |  |
| Armenia | √ | √ | √ | √ | √ | 2 |  |
| Australia | √ | √ | √ | √ | √ | 6 | #1 ♀ |
| Austria | √ | √ | √ | √ | √ | 6 | #2 ♂ |
| Azerbaijan | √ | √ | √ | √ | √ | 5 |  |
| Bahamas | √ | √ | √ | √ | √ | 1 |  |
| Bahrain | √ | √ | √ | √ | √ | 2 |  |
| Bangladesh | √ | √ | √ | √ | √ | 2 |  |
| Barbados | √ | √ | √ | √ | √ | 1 |  |
| Belarus | √ | √ | √ | √ | √ | 3 | #3 ♂ |
| Belgium | √ | √ | √ | √ | √ | 2 | #4 ♀ |
| Belize | √ | √ | √ | √ | √ | 1 |  |
| Benin | √ | √ | √ | √ | √ | 1 |  |
| Bhutan | √ | √ | √ | √ | √ | 2 |  |
| Plurinational State of Bolivia | √ | √ | √ | √ | √ | 3 |  |
| Bosnia and Herzegovina | √ | √ | √ | √ | √ | 3 | #5 ♀ |
| Botswana | √ | √ | √ | √ | √ | 1 |  |
| Brazil | √ | √ | √ | √ | √ | 6 |  |
| Brunei Darussalam | √ | √ | √ | √ | √ | 1 |  |
| Bulgaria | √ | √ | √ | √ | √ | 2 |  |
| Burkina Faso | √ | √ | √ | √ | √ | 1 |  |
| Burundi | √ | √ | √ | √ | √ | 1 |  |
| Cabo Verde | √ | √ | √ | √ | √ | 1 |  |
| Cambodia | √ | √ | √ | √ | √ | 1 |  |
| Cameroon | √ | √ | √ | √ | √ | 1 |  |
| Canada | √ | √ | √ | √ | √ | 3 | #6 ♀ |
| Central African Republic | √ | √ | √ | √ | √ | 1 |  |
| Chad | √ | √ | √ | √ | √ | 1 |  |
| Chile | √ | √ | √ | √ | √ | 2 |  |
| China | √ | √ | √ | √ | √ | 4 | #7 ♂ |
| Colombia | √ | √ | √ | √ | √ | 2 |  |
| Comoros | √ | √ | √ | √ | √ | 3 |  |
| Congo (Republic of the Congo) | √ | √ | √ | √ | √ | 2 |  |
| Costa Rica | √ | √ | √ | √ | √ | 2 |  |
| Côte d'Ivoire | √ | √ | √ | √ | √ | 4 |  |
| Croatia | √ | √ | √ | √ | √ | 4 | #8 ♀ |
| Cuba | √ | √ | √ | √ | √ | 4 |  |
| Cyprus | √ | √ | √ | √ | √ | 3 |  |
| Czech Republic | √ | √ | √ | √ | √ | 3 | #9 ♂ |
| Democratic People's Republic of Korea | √ | - | √ | √ | - | 2, and 1 via ICRC |  |
| Democratic Republic of the Congo (DRC) aka Congo-Kinshasa | √ | √ | √ | √ | √ | 2 |  |
| Denmark | √ | √ | √ | √ | √ | 5 | #10 ♀ |
| Djibouti | √ | √ | √ | √ | √ | 2 |  |
| Dominica | √ | √ | √ | √ | √ | 2 |  |
| Dominican Republic | √ | √ | √ | √ | √ | 3 |  |
| Ecuador | √ | √ | √ | √ | √ | 3 |  |
| Egypt | √ | √ | √ | √ | √ | 3 |  |
| El Salvador | √ | √ | √ | √ | √ | 2 |  |
| Equatorial Guinea | √ | √ | √ | √ | √ | 1 |  |
| Eritrea | √ | √ | √ | √ | √ | 1 |  |
| Estonia | √ | √ | √ | √ | √ | 3 |  |
| Eswatini | √ | √ | √ | √ | √ | 2 |  |
| Ethiopia | √ | √ | √ | √ | √ | 2 |  |
| Fiji | √ | √ | √ | √ | √ | 3 |  |
| Finland | √ | √ | √ | √ | √ | 6 | #11 ♀ |
| France | √ | √ | √ | √ | √ | 5 | #12 ♀ |
| Gabon | √ | √ | √ | √ | √ | 2 |  |
| Gambia | √ | √ | √ | √ | √ | 2 |  |
| Georgia | √ | √ | √ | √ | √ | 3 | #13 ♂ |
| Germany | √ | √ | √ | √ | √ | 6 | #14 ♂ |
| Ghana | √ | √ | √ | √ | √ | 2 |  |
| Greece | √ | √ | √ | √ | √ | 3 | #15 ♂ |
| Grenada | √ | √ | √ | √ | √ | 3 |  |
| Guatemala | √ | √ | √ | √ | √ | 3 |  |
| Guinea | √ | √ | √ | √ | √ | 2 |  |
| Guinea-Bissau | √ | √ | √ | √ | √ | 2 |  |
| Guyana | √ | √ | √ | √ | √ | 2 |  |
| Haiti | √ | √ | √ | √ | √ | 2 |  |
| Holy See, Apostolic Nunciature | √ | √ | √ | √ | √ | 3 |  |
| Honduras | √ | √ | √ | √ | √ | 4 |  |
| Hungary | √ | √ | √ | √ | √ | 4 | #16 ♀ |
| Iceland | √ | √ | √ | √ | √ | 3 |  |
| India | √ | √ | √ | √ | √ | 6 | #17 ♀ |
| Indonesia | √ | √ | √ | √ | √ | 3 |  |
| Islamic Republic of Iran | √ | √ | √ | √ | Former | 6 |  |
| Iraq | √ | √ | √ | √ | √ | 2 |  |
| Ireland | √ | √ | √ | √ | √ | 4 |  |
| Israel | √ | √ | √ | √ | √ | 6 | #18 ♂ |
| Italy | √ | √ | √ | √ | √ | 6 | #19 |
| Jamaica | √ | √ | √ | √ | √ | 3 |  |
| Japan | √ | √ | √ | √ | √ | 4 |  |
| Jordan | √ | √ | √ | √ | √ | 3 |  |
| Kazakhstan | √ | √ | √ | √ | √ | 3 |  |
| Kenya | √ | √ | √ | √ | √ | 3 | #20 ♂ |
| Kiribati | √ | √ | √ | √ | √ | 2 |  |
| Kuwait | √ | √ | √ | √ | √ | 2 |  |
| Kyrgyzstan | √ | √ | √ | √ | √ | 3 |  |
| Lao People's Democratic Republic | √ | √ | √ | √ | √ | 1 |  |
| Latvia | √ | √ | √ | √ | √ | 2 |  |
| Lebanon | √ | √ | √ | √ | √ | 2 |  |
| Lesotho | √ | √ | √ | √ | √ | 3 |  |
| Liberia | √ | √ | √ | √ | √ | 2 |  |
| Libya | √ | √ | √ | ? (split) | √ | 3 |  |
| Liechtenstein | √ | √ | √ | √ | √ | 2 |  |
| Lithuania | √ | √ | √ | √ | √ | 3 |  |
| Luxembourg | √ | √ | √ | √ | √ | 4 | #21 ♀ |
| Madagascar | √ | √ | √ | √ | √ | 3 |  |
| Malawi | √ | √ | √ | √ | √ | 2 |  |
| Malaysia | √ | √ | √ | √ | √ | 3 |  |
| Maldives | √ | √ | √ | √ | √ | 2 | #22 ♀ |
| Mali | √ | √ | √ | √ | √ | 2 | #23 ♀ |
| Malta | √ | √ | √ | √ | √ | 3 |  |
| Marshall Islands | √ | √ | √ | √ | √ | 2 |  |
| Mauritania | √ | √ | √ | √ | √ | 1 |  |
| Mauritius | √ | √ | √ | √ | √ | 2 |  |
| Mexico | √ | √ | √ | √ | √ | 5 |  |
| Federated States of Micronesia | √ | √ | √ | √ | √ | 2 |  |
| Monaco | √ | √ | √ | √ | √ | 1 |  |
| Mongolia | √ | √ | √ | √ | √ | 2 |  |
| Montenegro | √ | √ | √ | √ | √ | 2 |  |
| Morocco | √ | √ | √ | √ | √ | 3 | #24 ♂ |
| Mozambique | √ | √ | √ | √ | √ | 2 |  |
| Myanmar | √ | √ | √ | √ | Exile | 2 | #25 ♀ |
| Namibia | √ | √ | √ | √ | √ | 3 |  |
| Nauru | √ | √ | √ | √ | √ | 2 |  |
| Nepal | √ | √ | √ | √ | √ | 2 |  |
| Netherlands | √ | √ | √ | √ | √ | 5 | #26 ♂ |
| New Zealand | √ | √ | √ | √ | √ | 3 | #27 ♀ |
| Nicaragua | √ | √ | √ | √ | √ | 4 |  |
| Niger | √ | √ | √ | √ | Pre coup | 2 |  |
| Nigeria | √ | √ | √ | √ | √ | 6 |  |
| North Macedonia | √ | √ | √ | √ | √ | 2 |  |
| Norway | √ | √ | √ | √ | √ | 6 | #28 ♀ |
| Oman | √ | √ | √ | √ | √ | 2 |  |
| Pakistan | √ | √ | √ | √ | √ | 3 |  |
| Palau | √ | √ | √ | √ | √ | 2 |  |
| Palestine | √ | √ | √ | √ | √ | 3 | #29 ♂ |
| Panama | √ | √ | √ | √ | √ | 3 | #30 ♂ |
| Papua New Guinea | √ | √ | √ | √ | √ | 2 |  |
| Paraguay | √ | √ | √ | √ | √ | 3 |  |
| Peru | √ | √ | √ | √ | √ | 3 |  |
| Philippines | √ | √ | √ | √ | √ | 6 | #31 ♂ |
| Poland | √ | √ | √ | √ | √ | 4 |  |
| Portugal | √ | √ | √ | √ | √ | 4 |  |
| Qatar | √ | √ | √ | √ | √ | 3 |  |
| Republic of Korea (South Korea) | √ | √ | √ | √ | √ | 5 |  |
| Republic of Moldova | √ | √ | √ | √ | √ | 3 | #32 ♀ |
| Romania | √ | √ | √ | √ | √ | 4 |  |
| Russian Federation | √ | √ | √ | √ | Former | 3 |  |
| Rwanda | √ | √ | √ | √ | √ | 2 |  |
| Saint Kitts and Nevis | √ | √ | √ | √ | √ | 2 |  |
| Saint Lucia | √ | √ | √ | √ | √ | 3 |  |
| Saint Vincent and the Grenadines | √ | √ | √ | √ | √ | 3 |  |
| Samoa | √ | √ | √ | √ | √ | 2 |  |
| San Marino | √ | √ | √ | √ | √ | 2 |  |
| São Tomé and Príncipe | √ | √ | √ | √ | √ | 1 |  |
| Saudi Arabia | √ | √ | √ | √ | √ | 4 | #33 ♀ |
| Senegal | √ | √ | √ | √ | √ | 3 |  |
| Serbia | √ | √ | √ | √ | √ | 3 |  |
| Seychelles | √ | √ | √ | √ | √ | 2 |  |
| Sierra Leone | √ | √ | √ | √ | √ | 3 |  |
| Singapore | √ | √ | √ | √ | √ | 6 | #34 ♂ |
| Slovakia | √ | √ | √ | √ | √ | 4 |  |
| Slovenia | √ | √ | √ | √ | √ | 3 |  |
| Solomon Islands | √ | √ | √ | √ | √ | 2 |  |
| Somalia | √ | √ | √ | √ | √ | 3 |  |
| South Africa | √ | √ | √ | √ | √ | 2 |  |
| South Sudan | √ | √ | √ | √ | √ | 3 |  |
| Spain | √ | √ | √ | √ | √ | 6 | #35 ♀ |
| Sri Lanka | √ | √ | √ | √ | √ | 4 |  |
| Sudan | √ | √ | √ | √ | √ | 4 |  |
| Suriname | √ | √ | √ | √ | √ | 4 |  |
| Sweden | √ | √ | √ | √ | √ | 6 | #36 ♂ |
| Switzerland | √ | √ | √ | √ | √ | 6 | #37 ♀ |
| Syrian Arab Republic | √ | √ | √ | √ | √ | 2 |  |
| Taiwan | √ | √ | √ | √ | √ | 5 | #38 ♀ |
| Tajikistan | √ | √ | √ | √ | √ | 3 |  |
| Thailand | √ | √ | √ | √ | √ | 6 |  |
| Timor-Leste | √ | √ | √ | √ | √ | 2 |  |
| Togo | √ | √ | √ | √ | √ | 3 |  |
| Tonga | √ | √ | √ | √ | √ | 2 |  |
| Trinidad and Tobago | √ | √ | √ | √ | √ | 2 |  |
| Tunisia | √ | √ | √ | √ | √ | 3 |  |
| Turkey | √ | √ | √ | √ | √ | 5 |  |
| Turkmenistan | √ | √ | √ | √ | √ | 4 |  |
| Tuvalu | √ | √ | √ | √ | √ | 2 |  |
| Uganda | √ | √ | √ | √ | √ | 2 |  |
| Ukraine | √ | √ | √ | √ | √ | 6 | #39 ♀ |
| United Arab Emirates | √ | √ | √ | √ | √ | 6 | #40 ♀ |
| United Kingdom of Great Britain and Northern Ireland | √ | √ | √ | √ | √ | 6 | #41 ♂ |
| United Republic of Tanzania | √ | √ | √ | √ | √ | 4 |  |
| United States of America | √ | √ | √ | √ | √ | 6 | #42 ♂ |
| Uruguay | √ | √ | √ | √ | √ | 3 |  |
| Uzbekistan | √ | √ | √ | √ | √ | 2 |  |
| Vanuatu | √ | √ | √ | √ | √ | 2 |  |
| Bolivarian Republic of Venezuela | √ | √ | √ | √ | Exile | 3 |  |
| Viet Nam | √ | √ | √ | √ | √ | 3 |  |
| Yemen | √ | √ | √ | √ | Former | 2 |  |
| Zambia | √ | √ | √ | √ | √ | 3 |  |
| Zimbabwe | √ | √ | √ | √ | Former | 3 |  |
| I**nternational Organisations** |  |  |  |  |  |  |  |
| United Nations (UN) | √ | √ | N/A | N/A | N/A | # | #43 ♂ |
| United Nations specialised agency World Health Organisation (WHO) | √ | √ | N/A | N/A | N/A | # | #44 ♀ |
| United Nations High Commissioner for Refugees (UNHCR) | √ | √ | N/A | N/A | N/A | # | #45 ♂ |
| United Nations Children's Fund (UNICEF) | √ | √ | N/A | N/A | N/A | # | #46 ♂ |
| United Nations Educational, Scientific and Cultural Organization (UNESCO) | √ | √ | N/A | N/A | N/A | 3 |  |
| United Nations Programme on HIV/AIDS (UNAIDS) | √ | √ | N/A | N/A | N/A | 2 |  |
| **International Financial Institution** |  |  |  |  |  |  |  |
| World Bank (WB) | √ | √ | N/A | N/A | N/A | 2 |  |
| **International Non-Governmental Organisations** |  |  |  |  |  |  |  |
| International Committee of the Red Cross (ICRC) | √ | √ | N/A | N/A | N/A | 5 | #47 ♂ |
| World Economic Forum (WEF) | √ | √ | N/A | N/A | N/A | 3 | #48 ♀ |
| Africa Health Organisation (AHO) | √ | √ | N/A | N/A | N/A | 4 |  |
| Amnesty International | √ | √ | N/A | N/A | N/A | 2 |  |
| Center for Security and Emerging Technology (CSET) | √ | √ | N/A | N/A | N/A | 2 |  |
| Freedom House, Centers for Disease Control and Prevention (CDC) | √ | √ | N/A | N/A | N/A | 4 |  |
| Doctors Without Borders (Médecins Sans Frontières, MSF) | √ | √ | N/A | N/A | N/A | 4 | #49 ♂ |
| Global Organisation Against Female Genital Mutilation | √ | √ | N/A | N/A | N/A | 1 | #50 ♀ |
| IPAS - Partners for Reproductive Justice | √ | √ | N/A | N/A | N/A | 2 |  |
| Population Services International (PSI) | √ | √ | N/A | N/A | N/A | 2 |  |
